# Supplementary material
Source: PubMed Central journal article supplement (PMC1798053)

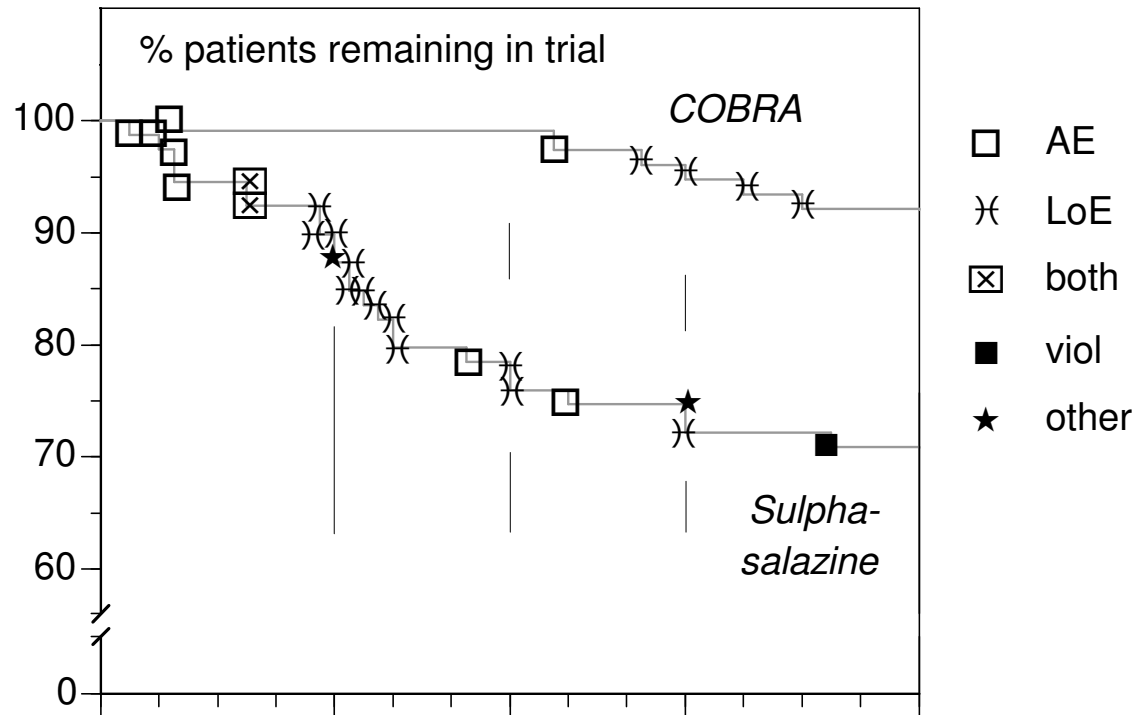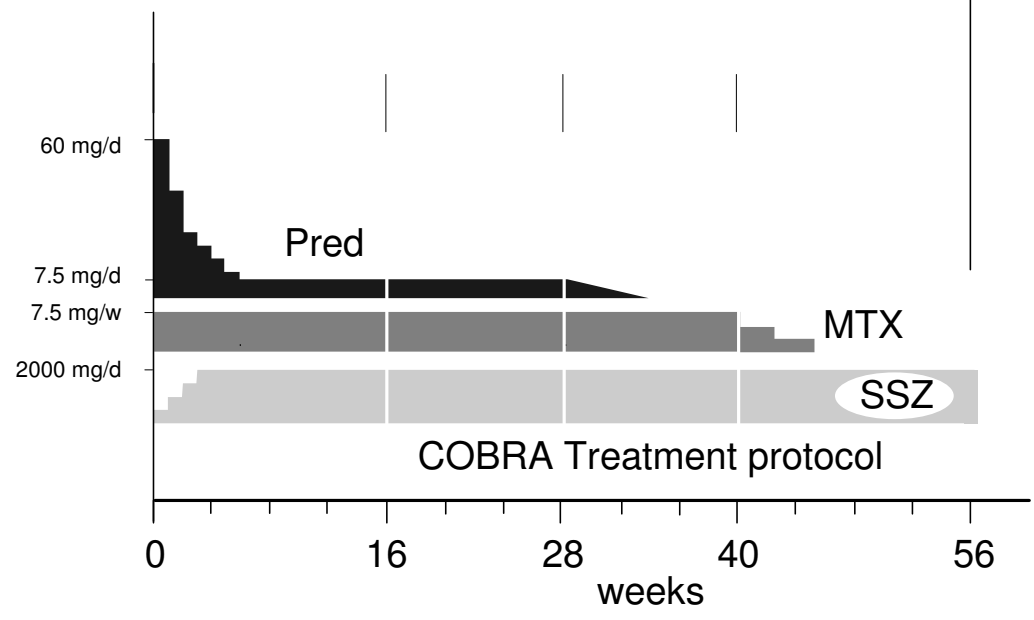

Supplement: annrheumd_ard.2005.038638_3.pdf [file annrheumd_ard.2005.038638_3.pdf]

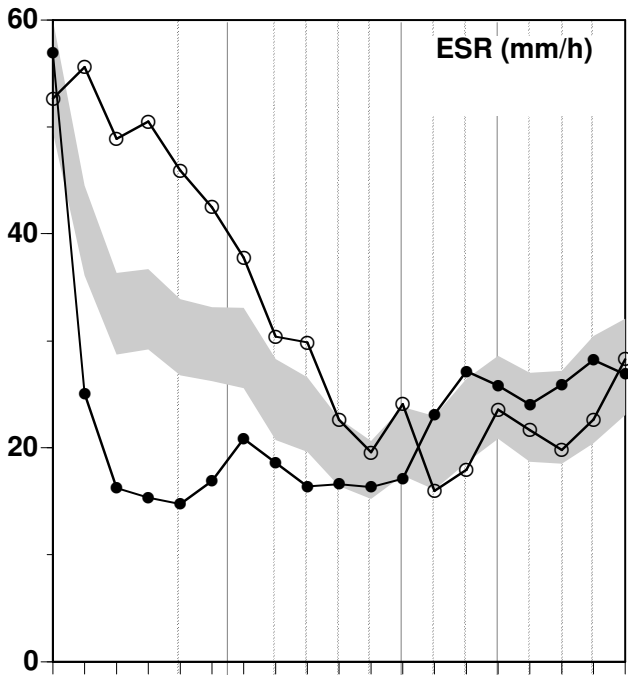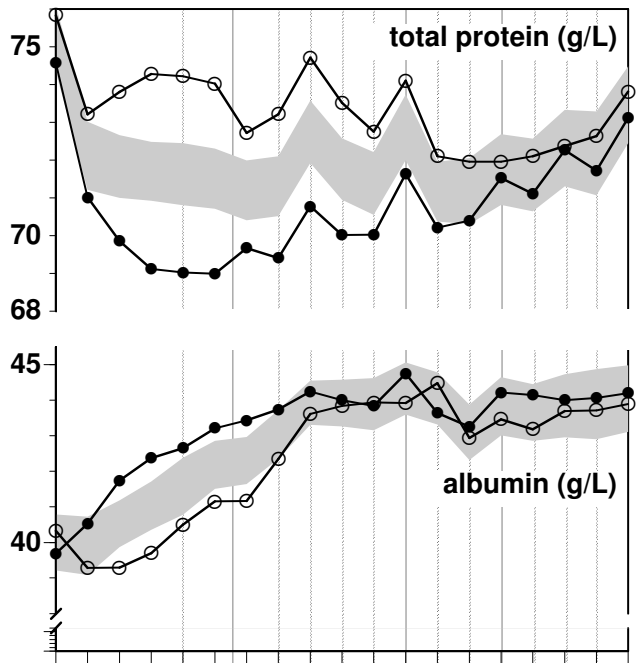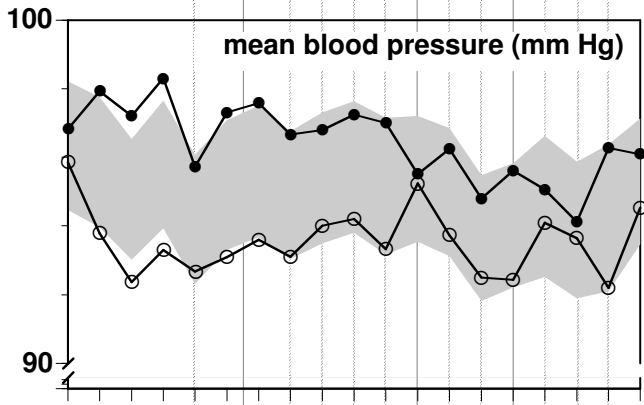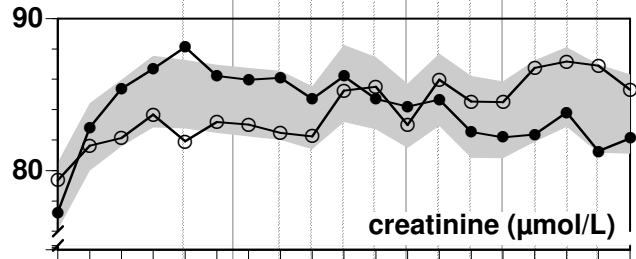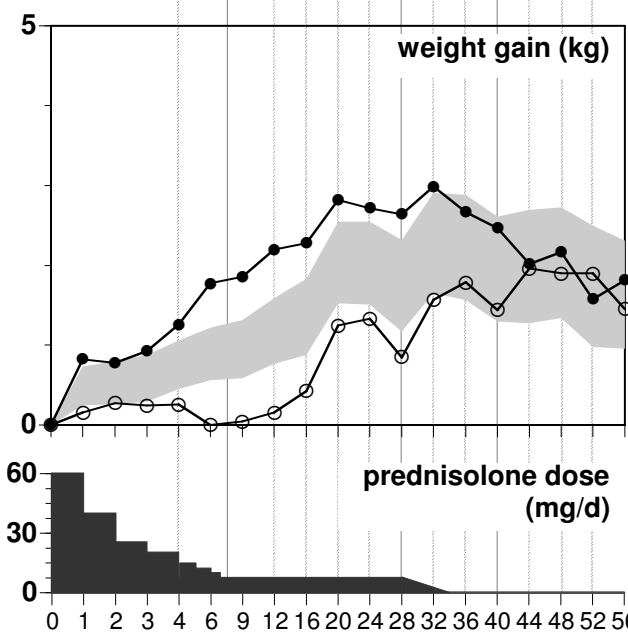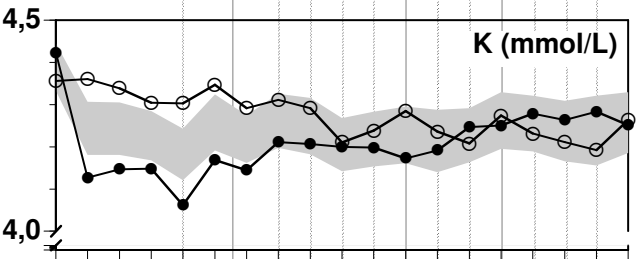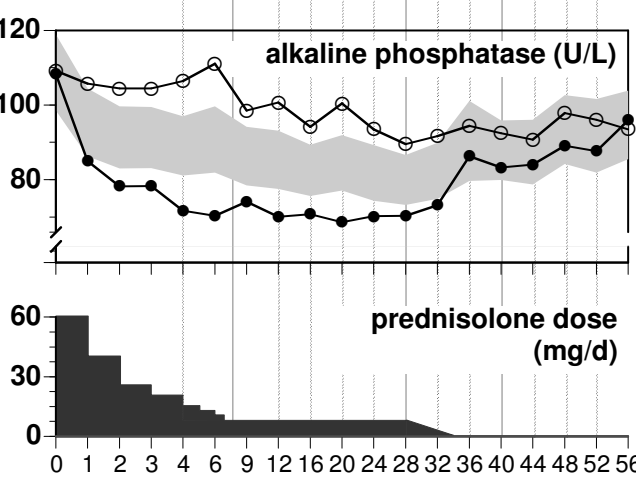

time (weeks)

Supplement: annrheumd_ard.2005.038638_4.pdf [file annrheumd_ard.2005.038638_4.pdf]

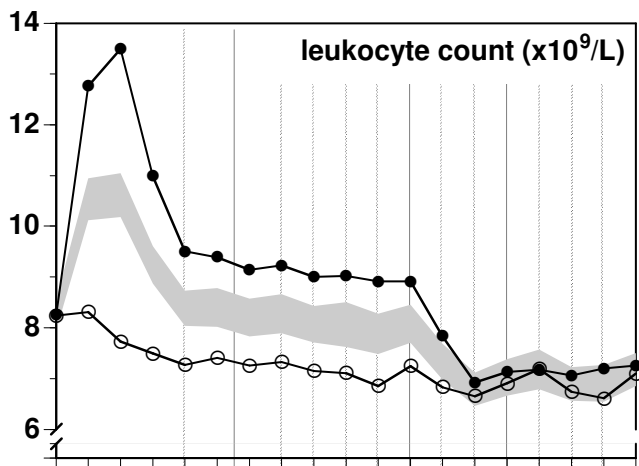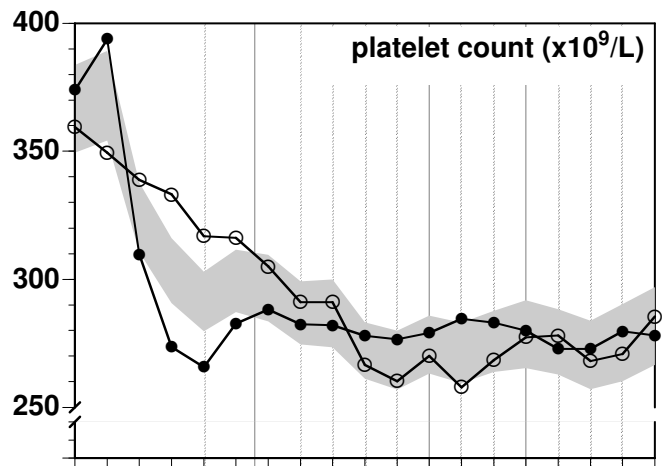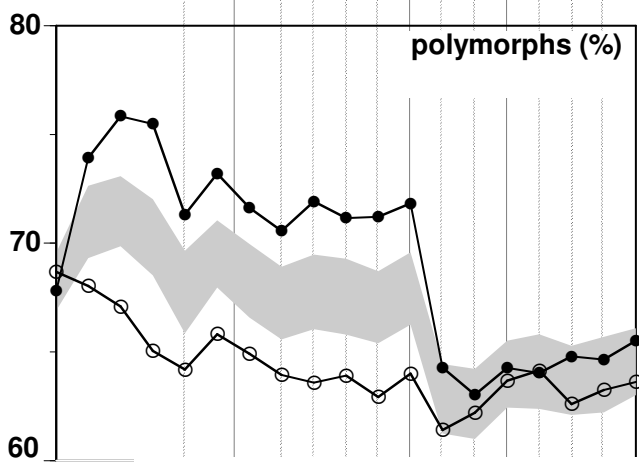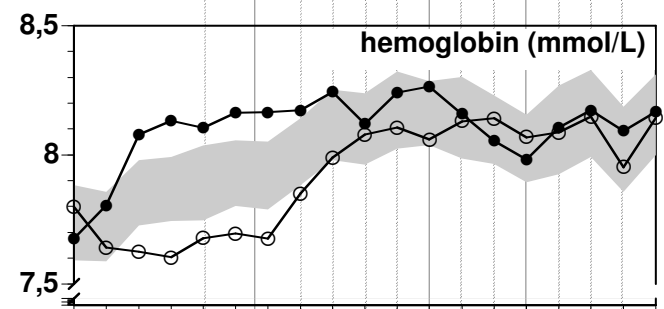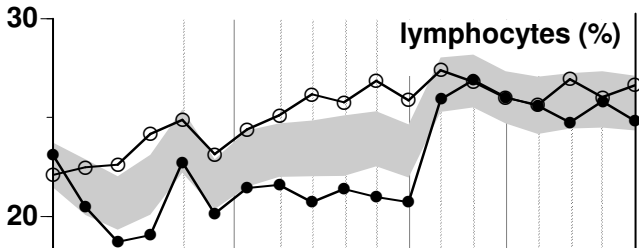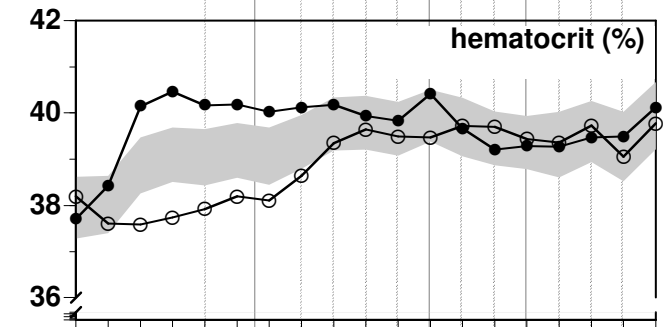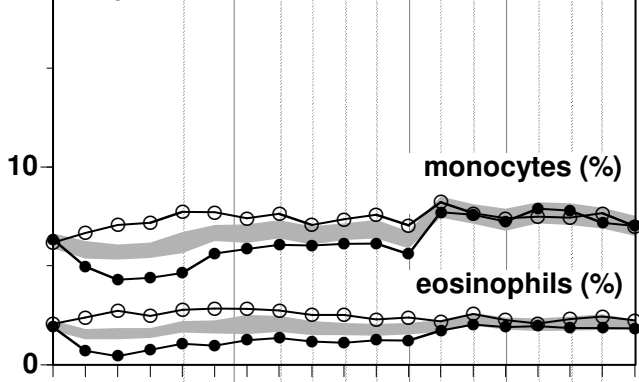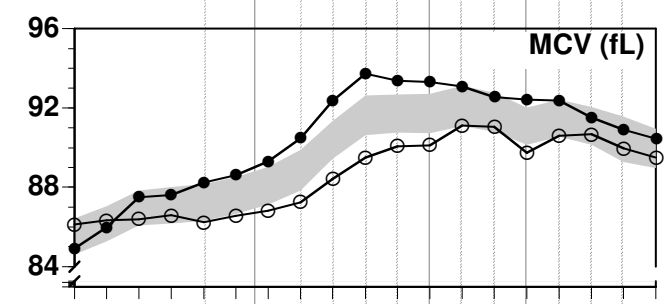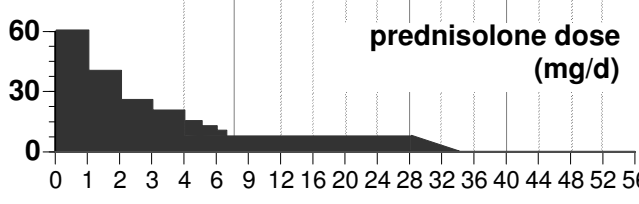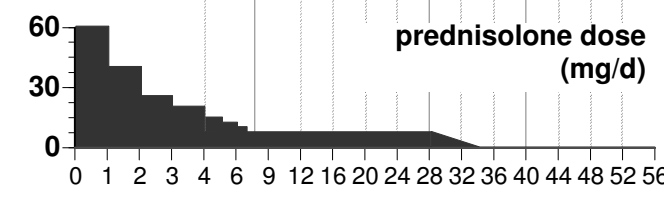

time (weeks)

Supplement: annrheumd_ard.2005.038638_5.pdf [file annrheumd_ard.2005.038638_5.pdf]
